# Supplementary material for: Development and testing of a polygenic risk score for breast cancer aggressiveness
Source: PubMed Central journal article supplement (PMC10185660; doi:10.1038/s41698-023-00382-z), 2023-05-15

## Development and testing of a polygenic risk score for breast cancer aggressiveness

### Supplementary Materials

**Supplementary Table 1. Datasets used in the development of the polygenic risk score for risk of recurrence score weighted on proliferation (ROR-P PRS)**

| <b>Study</b>                                                                                                               | <b>Number of cases</b> | <b>Selection criteria for cases</b>                                             | <b>Gene expression profiling method</b> | <b>SNP genotyping platform</b>                      | <b>Imputation reference</b> | <b>Quality control</b>                                                                                                     |
|----------------------------------------------------------------------------------------------------------------------------|------------------------|---------------------------------------------------------------------------------|-----------------------------------------|-----------------------------------------------------|-----------------------------|----------------------------------------------------------------------------------------------------------------------------|
| The Cancer Genome Atlas (TCGA)                                                                                             | 953                    | Invasive breast cancers, recurrences excluded                                   | RNA-Seq                                 | Affymetrix SNP 6.0                                  | 1000 Genomes                | SNPs excluded if minor allele frequency <0.5% or variant missing rate >5%. Individuals excluded if missing call rate > 5%. |
| Molecular Taxonomy of Breast Cancer International Consortium (METABRIC)                                                    | 496                    | Genotyped subset                                                                | Illumina HT-12 beadchip                 | Affymetrix SNP 6.0                                  | 1000 Genomes                |                                                                                                                            |
| Investigation of Serial Studies to Predict Your Therapeutic Response with Imaging And molecular analysis 2 (I-SPY 2 TRIAL) | 914                    | First 1400 consecutive cases underwent genotyping; ROR-P available for a subset | Agilent 44k array                       | Affymetrix Axiom Precision Medicine Diversity Array | 1000 Genomes                |                                                                                                                            |

**Supplementary Table 2. Datasets used to test the association between the polygenic risk score for the risk of recurrence score weighted on proliferation (ROR-P PRS) with clinical outcomes**

| Study          | Cases | Breast cancer deaths | Years of diagnosis, cases | Length of follow-up, median (IQR) | SNP genotyping platform           | Imputation reference                                                      | Quality control                                                                                                                                                                                                                             |
|----------------|-------|----------------------|---------------------------|-----------------------------------|-----------------------------------|---------------------------------------------------------------------------|---------------------------------------------------------------------------------------------------------------------------------------------------------------------------------------------------------------------------------------------|
| UK Biobank     | 7,427 | 544                  | 2006-2019                 | 6.4 years                         | Affymetrix UK Biobank Axiom Array | Haplotype Reference Consortium (primary); UK10K, 1000 Genomes (secondary) | SNPs excluded if: variant missing rate >3%; minor allele frequency <0.01; heterozygosity more than 5 standard deviations from mean                                                                                                          |
| Pathways Study | 2,769 | 241                  | 2006-2013                 | 10.7 years                        | Illumina MultiEthnic Global-8     | Haplotype Reference Consortium                                            | SNPs excluded if: variant missing rate >2%; >1 Mendelian error in the HapMap trios included in genotyping; Hardy–Weinberg equilibrium ( $p < 1 \times 10^{-4}$ ); discordance between duplicate samples; or positional duplicated variants. |

**Supplementary Table 3. Characteristics of studies used for survival analysis of the polygenic risk score for the risk of recurrence score weighted on proliferation (ROR-P PRS)**

|                          | <b>UK Biobank</b>      | <b>Pathways Study</b>  |
|--------------------------|------------------------|------------------------|
| Characteristic           | N = 7,427 <sup>1</sup> | N = 2,769 <sup>1</sup> |
| Age at diagnosis (years) | 64 (57, 69)            | 62 (54, 70)            |
| Breast cancer deaths     | 544 (7.3%)             | 241 (8.7%)             |
| Follow-up time (years)   | 6.4 (3.7, 9.1)         | 10.7 (8.2, 12.3)       |
| Body mass index          |                        | 27 (24, 32)            |
| Unknown                  |                        | 1                      |
| Estrogen receptor status |                        |                        |
| positive                 |                        | 2,386 (86%)            |
| negative                 |                        | 382 (14%)              |
| Unknown                  |                        | 1                      |
| HER2 status              |                        |                        |
| positive                 |                        | 319 (12%)              |
| negative                 |                        | 2,337 (88%)            |
| Unknown                  |                        | 113                    |
| Histologic grade         |                        |                        |
| 1                        |                        | 795 (31%)              |
| 2                        |                        | 1,192 (46%)            |
| 3                        |                        | 612 (24%)              |
| Unknown                  |                        | 170                    |
| IHC subtype              |                        |                        |
| Luminal A                |                        | 2,066 (78%)            |
| Luminal B                |                        | 224 (8.4%)             |
| Basal                    |                        | 270 (10%)              |
| HER2                     |                        | 95 (3.6%)              |
| Unknown                  |                        | 114                    |
| ROR-P                    |                        | 45 (17, 63)            |
| Unknown                  |                        | 2,285                  |

|                | <b>UK Biobank</b>      | <b>Pathways Study</b>  |
|----------------|------------------------|------------------------|
| Characteristic | N = 7,427 <sup>1</sup> | N = 2,769 <sup>1</sup> |
| ROR-P Group    |                        |                        |
| Low            |                        | 96 (20%)               |
| Medium         |                        | 194 (40%)              |
| High           |                        | 194 (40%)              |
| Unknown        |                        | 2,285                  |

<sup>1</sup>Median (IQR); n (%)

HER2, human epidermal growth factor receptor 2; IQR, interquartile range; ROR-P, risk of recurrence score weighted on proliferation

**Supplementary Table 4. Candidate single nucleotide polymorphisms for polygenic risk score for the risk of recurrence score weighted on proliferation (ROR-P PRS)**

See separate Excel file.

**Supplementary Table 5. Performance of polygenic risk scores for the risk of recurrence score weighted on proliferation (ROR-P PRS) by p-value threshold**

| <b>p-value threshold</b> | <b>Number of SNPs</b> | <b>RMSE</b> | <b>R-squared</b> | <b>MAE</b> |
|--------------------------|-----------------------|-------------|------------------|------------|
| 0.6                      | 124                   | 21.78       | 0.0382           | 17.74      |
| 0.575                    | 119                   | 21.73       | 0.0400           | 17.70      |
| 0.55                     | 111                   | 21.68       | 0.0418           | 17.66      |
| 0.525                    | 107                   | 21.68       | 0.0411           | 17.65      |
| 0.5                      | 104                   | 21.65       | 0.0419           | 17.63      |
| 0.475                    | 98                    | 21.61       | 0.0434           | 17.60      |
| 0.45                     | 92                    | 21.58       | 0.0449           | 17.57      |
| 0.425                    | 91                    | 21.57       | 0.0450           | 17.57      |
| 0.4                      | 84                    | 21.52       | 0.0475           | 17.51      |
| 0.375                    | 76                    | 21.47       | 0.0489           | 17.49      |
| 0.35                     | 67                    | 21.54       | 0.0419           | 17.53      |
| 0.325                    | 62                    | 21.52       | 0.0420           | 17.52      |
| 0.3                      | 59                    | 21.65       | 0.0315           | 17.66      |
| 0.275                    | 54                    | 21.63       | 0.0317           | 17.64      |
| 0.25                     | 50                    | 21.60       | 0.0330           | 17.62      |
| 0.225                    | 48                    | 21.59       | 0.0331           | 17.62      |
| 0.2                      | 42                    | 21.60       | 0.0315           | 17.62      |
| 0.175                    | 34                    | 21.61       | 0.0298           | 17.64      |
| 0.15                     | 28                    | 21.64       | 0.0254           | 17.65      |
| 0.125                    | 23                    | 21.65       | 0.0233           | 17.66      |
| 0.1                      | 19                    | 21.68       | 0.0199           | 17.69      |

**Supplementary Table 6. Associations between single nucleotide polymorphisms (SNPs) and the risk of recurrence score weighted on proliferation (ROR-P) for the 76-SNP ROR-P polygenic risk score**

| Variant     | chr | position  | Mapped Gene(s)                              | risk | other    | Coefficient | p-value |
|-------------|-----|-----------|---------------------------------------------|------|----------|-------------|---------|
| rs2992756   | 1   | 18807339  | IGSF21, KLHDC7A                             | T    | C        | -0.566      | 0.354   |
| rs1707302   | 1   | 46600917  | P3R3URF-PIK3R3                              | G    | A        | -0.651      | 0.294   |
| rs12118297  | 1   | 87779217  | LMO4, LINC02801                             | T    | G        | 1.171       | 0.130   |
| rs4971059   | 1   | 155148781 | TRIM46                                      | A    | G        | -1.143      | 0.069   |
| rs4951011   | 1   | 203766331 | ZBED6, ZC3H11A                              | G    | A        | 0.719       | 0.357   |
| rs4245739   | 1   | 204518842 | MDM4                                        | C    | A        | 1.092       | 0.112   |
| rs11117758  | 1   | 217220574 | ESRRG                                       | G    | A        | -0.740      | 0.333   |
| rs71801447  | 2   | 111925731 | MIR4435-2HG, BCL2L11                        | C    | CTTATGTT | 1.035       | 0.348   |
| rs4442975   | 2   | 217920769 | LINC01921, RN7SKP43, AC007749.1, AC007749.2 | G    | T        | -0.905      | 0.138   |
| rs34005590  | 2   | 217963060 | LINC01921, RN7SKP43                         | C    | A        | -2.868      | 0.056   |
| rs12479355  | 2   | 227226952 | NYAP2, MIR5702                              | A    | G        | -0.775      | 0.296   |
| rs6762644   | 3   | 4742276   | ITPR1                                       | G    | A        | -0.696      | 0.275   |
| rs1375631   | 3   | 16778867  | CDYLP1, PLCL2                               | G    | A        | -0.853      | 0.176   |
| rs12493607  | 3   | 30682939  | TGFBR2                                      | C    | G        | -0.947      | 0.151   |
| rs1053338   | 3   | 63967900  | ATXN7                                       | G    | A        | -1.297      | 0.164   |
| rs13066793  | 3   | 87037543  | VGLL3                                       | A    | G        | -1.509      | 0.215   |
| rs9833888   | 3   | 99723580  | CMSS1, FILIP1L                              | T    | G        | -1.202      | 0.101   |
| rs58058861  | 3   | 172285237 | LINC02068                                   | A    | G        | 0.953       | 0.202   |
| rs495367    | 4   | 1986972   | NELFA                                       | G    | A        | 0.868       | 0.176   |
| rs10022462  | 4   | 89243818  | PPM1K-DT                                    | T    | C        | -0.928      | 0.136   |
| rs72749841  | 5   | 49641645  | NA, EMB                                     | T    | C        | -1.439      | 0.305   |
| rs62355902  | 5   | 56053723  | C5orf67, MAP3K1, AC008940.1                 | T    | A        | -0.822      | 0.302   |
| rs1353747   | 5   | 58337481  | PDE4D                                       | T    | G        | 1.605       | 0.149   |
| rs138044103 | 5   | 67424121  | NA, RNU6-1232P                              | C    | CTG      | -0.652      | 0.282   |
| rs421379    | 5   | 91275313  | AC114316.1, PCBP2P3                         | T    | C        | 1.387       | 0.188   |
| rs6882649   | 5   | 111217786 | NREP                                        | T    | G        | -1.118      | 0.082   |
| rs11242675  | 6   | 1318878   | FOXQ1, LINC01394                            | T    | C        | -1.237      | 0.043   |
| rs71557345  | 6   | 26680698  | ZNF322, NA                                  | G    | A        | 2.482       | 0.159   |
| rs9383951   | 6   | 152295613 | ESR1                                        | C    | G        | -2.525      | 0.204   |
| rs2747652   | 6   | 152437016 | ESR1, AL078582.1                            | C    | T        | -0.990      | 0.098   |
| rs188092014 | 7   | 74341926  | SPDYE12P, CASTOR2                           | C    | G        | 1.128       | 0.275   |
| rs71559437  | 7   | 101552440 | CUX1                                        | G    | A        | 1.344       | 0.186   |
| rs720475    | 7   | 144074929 | ARHGEF5                                     | G    | A        | -0.769      | 0.292   |
| rs66823261  | 8   | 170692    | RPL23AP53                                   | C    | T        | -0.683      | 0.349   |

|             |    |           |                                          |     |     |        |       |
|-------------|----|-----------|------------------------------------------|-----|-----|--------|-------|
| rs142890050 | 8  | 23480253  | RNU4-71P, SINHCAFP3                      | C   | CTT | 1.584  | 0.008 |
| rs13365225  | 8  | 36858483  | KCNU1, SMARCE1P4, AC092818.1, AC090453.1 | A   | G   | -0.740 | 0.321 |
| rs58847541  | 8  | 124610166 | RN7SKP155, KLHL38                        | A   | G   | -1.406 | 0.081 |
| rs17350191  | 8  | 124757661 | ANXA13, FAM91A1                          | T   | C   | 0.844  | 0.191 |
| rs4742903   | 9  | 106856793 | SMC2                                     | C   | G   | 0.900  | 0.152 |
| rs10760444  | 9  | 129396434 | LMX1B                                    | G   | A   | -0.913 | 0.127 |
| rs2380205   | 10 | 5886734   | ANKRD16, GDI2                            | C   | T   | 0.606  | 0.327 |
| rs7072776   | 10 | 22032942  | MLLT10, DNAJC1                           | A   | G   | -0.768 | 0.235 |
| rs140936696 | 10 | 95292187  | CEP55, FFAR4                             | CAA | C   | -0.939 | 0.209 |
| rs11199914  | 10 | 123093901 | LINC01153, RN7SKP167                     | C   | T   | -0.580 | 0.360 |
| rs35054928  | 10 | 123340431 | FGFR2                                    | GC  | G   | -1.101 | 0.075 |
| rs2912774   | 10 | 123348662 | FGFR2                                    | T   | G   | -1.114 | 0.071 |
| rs45631563  | 10 | 123349324 | FGFR2                                    | A   | T   | -2.165 | 0.188 |
| rs6597981   | 11 | 803017    | PIDD1                                    | G   | A   | 0.615  | 0.331 |
| rs537626    | 11 | 69307695  | LINC01488                                | C   | G   | -2.169 | 0.008 |
| rs2059614   | 11 | 125259424 | PKNOX2                                   | G   | A   | -2.502 | 0.044 |
| rs7297051   | 12 | 28174817  | PTHLH, CCDC91                            | C   | T   | 1.413  | 0.054 |
| rs1027113   | 12 | 29140260  | NA                                       | A   | G   | -1.396 | 0.218 |
| rs202049448 | 12 | 85009437  | RPL6P25, SLC6A15                         | T   | C   | -1.500 | 0.018 |
| rs11065822  | 12 | 111600134 | CUX2                                     | G   | T   | -0.955 | 0.162 |
| rs1061657   | 12 | 115108136 | TBX3                                     | C   | T   | -0.681 | 0.331 |
| rs1292011   | 12 | 115836522 | TBX3, UBA52P7, AC009803.2, AC078880.2    | A   | G   | -1.128 | 0.063 |
| rs206966    | 12 | 120832146 | RPS27P25, COX6A1                         | T   | C   | 1.114  | 0.174 |
| rs3784099   | 14 | 68749927  | RAD51B                                   | A   | G   | -0.791 | 0.237 |
| rs11076805  | 16 | 4106788   | ADCY9                                    | C   | A   | 0.928  | 0.191 |
| rs2432539   | 16 | 56420987  | AMFR                                     | A   | G   | 0.933  | 0.138 |
| rs4496150   | 16 | 87085237  | LINC02188, LINC02181                     | C   | A   | 1.153  | 0.104 |
| rs72826962  | 17 | 40836389  | CNTNAP1                                  | T   | C   | -4.332 | 0.195 |
| rs745570    | 17 | 77781725  | CBX8, LINC01977                          | A   | G   | -1.062 | 0.086 |
| rs1436904   | 18 | 24570667  | CHST9, AQP4-AS1                          | T   | G   | -1.170 | 0.059 |
| rs36194942  | 18 | 25401204  | AC090936.1, CDH2                         | A   | AT  | 0.995  | 0.125 |
| rs67397200  | 19 | 17401404  | ANKLE1, ABHD8                            | G   | C   | 1.868  | 0.005 |
| rs2965183   | 19 | 19545696  | GATAD2A                                  | A   | G   | 0.727  | 0.248 |
| rs113701136 | 19 | 30277729  | AC008798.3, CCNE1                        | T   | C   | 0.753  | 0.247 |
| rs71338792  | 19 | 46183031  | GIPR                                     | AT  | A   | -0.859 | 0.289 |
| rs141526427 | 20 | 11502618  | NA, PGAM3P                               | A   | AAC | -1.123 | 0.090 |
| rs6065254   | 20 | 39248265  | NA, MAFB                                 | 0   | 0   | -1.082 | 0.082 |
| rs6122906   | 20 | 48945911  | LINC01271, RN7SL636P                     | G   | A   | -1.137 | 0.122 |



|            |    |          |                |   |   |        |       |
|------------|----|----------|----------------|---|---|--------|-------|
| rs2823093  | 21 | 16520832 | NRIP1, CYCSP42 | G | A | -0.905 | 0.183 |
| rs738321   | 22 | 38568833 | PLA2G6         | C | G | -0.560 | 0.358 |
| rs6001930  | 22 | 40876234 | MRTFA          | C | T | -1.705 | 0.075 |
| rs73161324 | 22 | 42038786 | XRCC6          | T | C | -2.739 | 0.091 |

**Supplementary Table 7. Results of Cox proportional hazards models of the polygenic risk score for the risk of recurrence score weighted on proliferation (ROR-P PRS) versus breast cancer survival and invasive recurrence in the Pathways Study**

|                               | Breast cancer death |                       | Invasive recurrence |                       |
|-------------------------------|---------------------|-----------------------|---------------------|-----------------------|
|                               | HR (95% CI)         | p-value               | HR (95% CI)         | p-value               |
| <b>Model 1<sup>a</sup></b>    |                     |                       |                     |                       |
| ROR-P PRS                     | 1.14 (1.01-1.29)    | 4.1x10 <sup>-2</sup>  | 1.11 (1.00-1.24)    | 4.2x10 <sup>-2</sup>  |
| <b>Model 2<sup>a</sup></b>    |                     |                       |                     |                       |
| ROR-P PRS                     | 1.14 (1.00-1.29)    | 4.5x10 <sup>-2</sup>  | 1.12 (1.01-1.24)    | 4.0x10 <sup>-2</sup>  |
| Age at diagnosis              | 1.01 (1.00-1.02)    | 4.8x10 <sup>-2</sup>  | 1.00 (0.99-1.01)    | 4.0x10 <sup>-1</sup>  |
| BMI                           | 1.02 (1.00-1.04)    | 1.6x10 <sup>-2</sup>  | 1.01 (0.99-1.02)    | 3.5x10 <sup>-1</sup>  |
| <b>Model 3<sup>a,b</sup></b>  |                     |                       |                     |                       |
| ROR-P PRS                     | 1.10 (0.97-1.25)    | 1.3x10 <sup>-1</sup>  | 1.11 (1.00-1.23)    | 5.6x10 <sup>-2</sup>  |
| Age at diagnosis              | 1.02 (1.01-1.03)    | 2.4x10 <sup>-3</sup>  | 1.00 (0.99-1.01)    | 6.2x10 <sup>-1</sup>  |
| BMI                           | 1.02 (1.00-1.04)    | 6.6x10 <sup>-2</sup>  | 1.00 (0.99-1.02)    | 8.9x10 <sup>-1</sup>  |
| Stage <sup>c</sup>            |                     |                       |                     |                       |
| I                             | Ref.                |                       | Ref.                |                       |
| II                            | 2.65 (1.88-3.73)    | 3.0x10 <sup>-8</sup>  | 2.30 (1.79-2.97)    | 1.2x10 <sup>-10</sup> |
| III                           | 8.55 (5.94-12.3)    | <2x10 <sup>-16</sup>  | 5.44 (4.06-7.28)    | <2x10 <sup>-16</sup>  |
| IV                            | 44.5 (28.1-70.4)    | <2x10 <sup>-16</sup>  | 5.43 (3.04-9.69)    | 1.0x10 <sup>-8</sup>  |
| <b>Model 4<sup>a,b</sup></b>  |                     |                       |                     |                       |
| ROR-P PRS                     | 1.09 (0.96-1.24)    | 1.8x10 <sup>-1</sup>  | 1.10 (0.99-1.22)    | 7.1x10 <sup>-2</sup>  |
| Age at diagnosis              | 1.03 (1.02-1.04)    | 8.4x10 <sup>-6</sup>  | 1.01 (1.00-1.02)    | 2.7x10 <sup>-1</sup>  |
| BMI                           | 1.02 (1.00-1.04)    | 7.1x10 <sup>-2</sup>  | 1.00 (0.99-1.02)    | 8.6x10 <sup>-1</sup>  |
| Stage <sup>c</sup>            |                     |                       |                     |                       |
| I                             | Ref.                |                       | Ref.                |                       |
| II                            | 1.95 (1.34-2.84)    | 5.5x10 <sup>-4</sup>  | 2.08 (1.57-2.75)    | 2.8x10 <sup>-7</sup>  |
| III                           | 5.90 (3.87-8.99)    | <2x10 <sup>-16</sup>  | 4.75 (3.39-6.64)    | <2x10 <sup>-16</sup>  |
| IV                            | 36.2 (22.4-58.4)    | <2x10 <sup>-16</sup>  | 4.38 (2.40-7.97)    | 1.4x10 <sup>-6</sup>  |
| Chemotherapy                  | 2.15 (1.32-3.50)    | 2.0x10 <sup>-3</sup>  | 1.26 (0.83-1.91)    | 2.8x10 <sup>-1</sup>  |
| Taxane therapy                | 0.91 (0.57-1.45)    | 6.9x10 <sup>-1</sup>  | 0.98 (0.65-1.47)    | 9.1x10 <sup>-1</sup>  |
| Hormonal therapy              | 0.50 (0.37-0.66)    | 1.2x10 <sup>-6</sup>  | 0.73 (0.58-0.91)    | 5.7x10 <sup>-3</sup>  |
| Radiation therapy             | 0.74 (0.55-1.00)    | 5.1x10 <sup>-2</sup>  | 0.88 (0.69-1.12)    | 2.9x10 <sup>-1</sup>  |
| Trastuzumab                   | 0.53 (0.37-0.75)    | 4.5x10 <sup>-4</sup>  | 0.89 (0.68-1.18)    | 4.1x10 <sup>-1</sup>  |
| <b>Model 5<sup>a, c</sup></b> |                     |                       |                     |                       |
| ROR-P PRS                     | 0.95 (0.77-1.17)    | 6.2x10 <sup>-1</sup>  | 1.01 (0.83-1.22)    | 9.5x10 <sup>-1</sup>  |
| ROR-P                         | 1.02 (1.01-1.03)    | 9.6x10 <sup>-4</sup>  | 1.01 (1.00-1.02)    | 4.7x10 <sup>-2</sup>  |
| <b>Model 6<sup>a</sup></b>    |                     |                       |                     |                       |
| ROR-P PRS                     | 1.12 (0.98-1.27)    | 8.7x10 <sup>-2</sup>  | 1.10 (0.99-1.23)    | 6.4x10 <sup>-2</sup>  |
| ER status                     |                     |                       |                     |                       |
| Positive                      | Ref.                |                       | Ref.                |                       |
| Negative                      | 2.48 (1.86-3.30)    | 7.2x10 <sup>-10</sup> | 1.79 (1.38-2.32)    | 1.3x10 <sup>-5</sup>  |

<sup>a</sup>All models are adjusted for genetic ancestry, PC1-10

<sup>b</sup>Model includes subset of 2,689 cancers with available stage data with 230 breast cancer deaths

<sup>c</sup>American Joint Committee on Cancer (AJCC) Cancer Staging Manual, 6<sup>th</sup> Edition

<sup>c</sup>Model includes subset of 484 cancers with available ROR-P with 87 events

Abbreviations: BMI, body mass index; CI, confidence interval; ER, estrogen receptor; HR, hazard ratio; PRS, polygenic risk score; ROR-P, risk of recurrence score weighted on proliferation; Tx., therapy

**Supplementary Table 8. Results of Cox proportional hazards models for the risk of recurrence score weighted on proliferation (ROR-P PRS), risk of estrogen-negative versus positive breast cancer (PRS<sub>ER-/ER+</sub>), and joint model including both ROR-P PRS and PRS<sub>ER-/ER+</sub>**

|                        | UK Biobank       |                      | Pathways         |                      | Meta-analysis    |                       |      |                  |                |
|------------------------|------------------|----------------------|------------------|----------------------|------------------|-----------------------|------|------------------|----------------|
|                        | HR (95% CI)      | p-value              | HR (95% CI)      | p-value              | HR (95% CI)      | p-value               | Q    | P <sub>het</sub> | I <sup>2</sup> |
| ROR-P PRS              | 1.13 (1.04-1.23) | 5.4x10 <sup>-3</sup> | 1.14 (1.01-1.29) | 4.1x10 <sup>-2</sup> | 1.13 (1.06-1.21) | 4.0x10 <sup>-4</sup>  | 0.01 | 0.91             | 0%             |
| PRS <sub>ER-/ER+</sub> | 1.15 (1.07-1.23) | 6.8x10 <sup>-5</sup> | 1.12 (1.00-1.26) | 5.7x10 <sup>-2</sup> | 1.14 (1.08-1.22) | <1.0x10 <sup>-4</sup> | 0.15 | 0.70             | 0%             |
| <b>Joint model</b>     |                  |                      |                  |                      |                  |                       |      |                  |                |
| ROR-P PRS              | 1.09 (1.00-1.19) | 5.8x10 <sup>-2</sup> | 1.11 (0.97-1.27) | 1.2x10 <sup>-1</sup> | 1.10 (1.02-1.18) | 1.4x10 <sup>-2</sup>  | 0.05 | 0.82             | 0%             |
| PRS <sub>ER-/ER+</sub> | 1.13 (1.05-1.21) | 1.0x10 <sup>-3</sup> | 1.09 (0.96-1.23) | 2.0x10 <sup>-1</sup> | 1.12 (1.05-1.19) | 3.0x10 <sup>-4</sup>  | 0.24 | 0.62             | 0%             |

All models are adjusted for genetic ancestry, PC1-10

Abbreviations: CI, confidence interval; HR, hazard ratio; PRS, polygenic risk score; ROR-P, risk of recurrence score weighted on proliferation

**Supplementary Figure 1. Distribution of the risk of recurrence score weighted on proliferation (ROR-P) in the polygenic risk score (PRS) development datasets**

Histograms of ROR-P in breast cancers from (A) The Cancer Genome Atlas, n=953; (B) Molecular Taxonomy of Breast Cancer International Consortium (METABRIC), n=496; and (C) Investigation of Serial Studies to Predict Your Therapeutic Response with Imaging And molecular analysis 2 (I-SPY 2 TRIAL), n=914.

A.

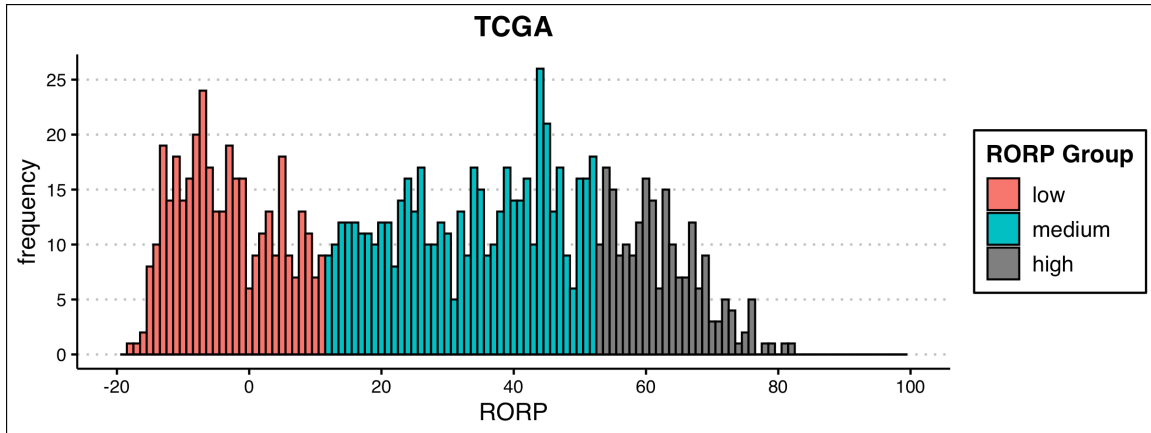

B.

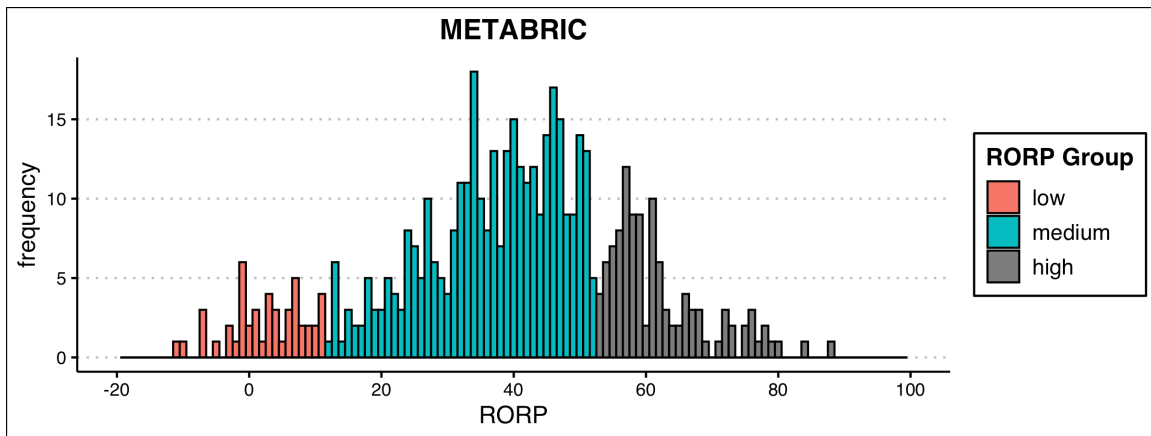

C.

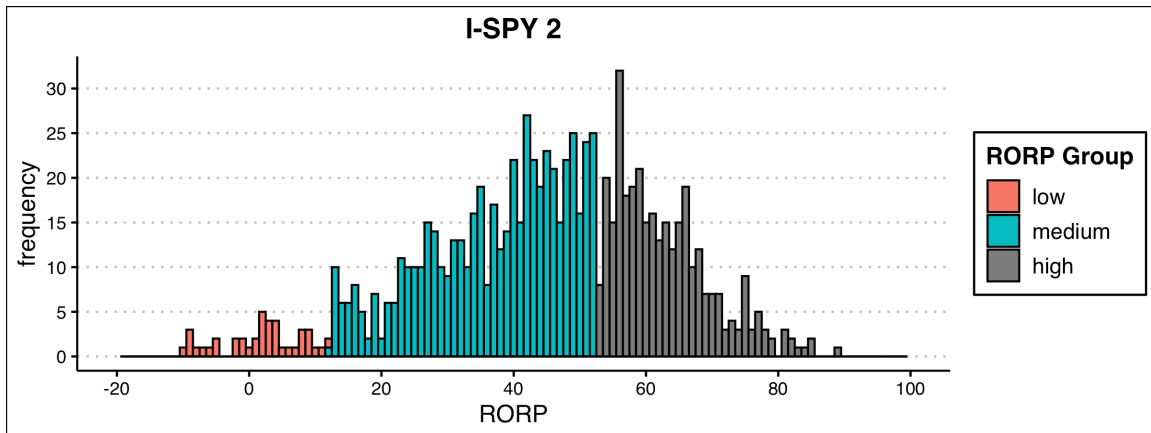

**Supplementary Figure 2. Distribution of the risk of recurrence score weighted on proliferation (ROR-P) in the Pathways Study**

Histogram of ROR-P breast cancers from the Pathways Study that underwent tumor gene expression profiling, n=484.

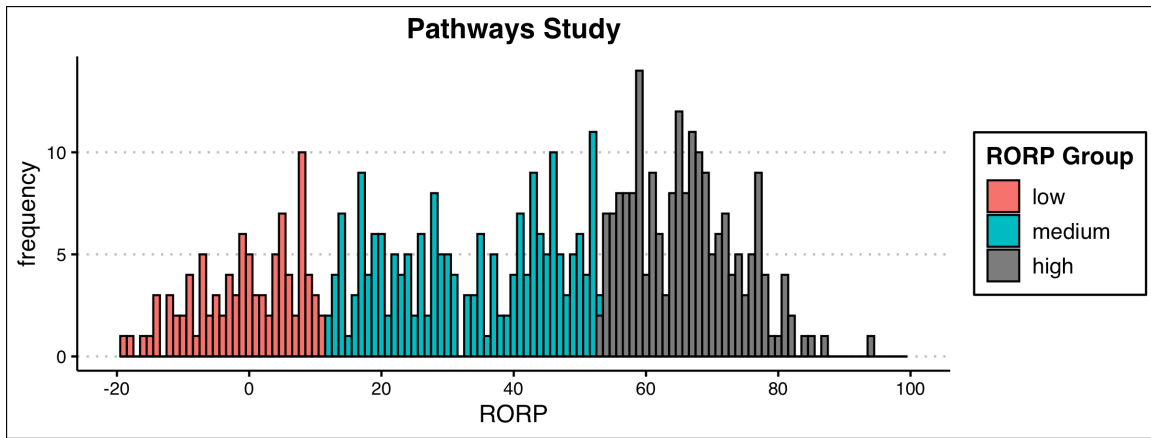

**Supplementary Figure 3. Distributions of polygenic risk score for the risk of recurrence score weighted on proliferation (ROR-P PRS) in UK Biobank and the Pathways Study**

Histograms of the ROR-P PRS are shown for (A) UK Biobank, (B) the Pathways Study. The mean (standard deviation) of the ROR-P PRS was -28.2 (5.0) in the UK Biobank and -31.0 (5.0) in the Pathways Study.

A.

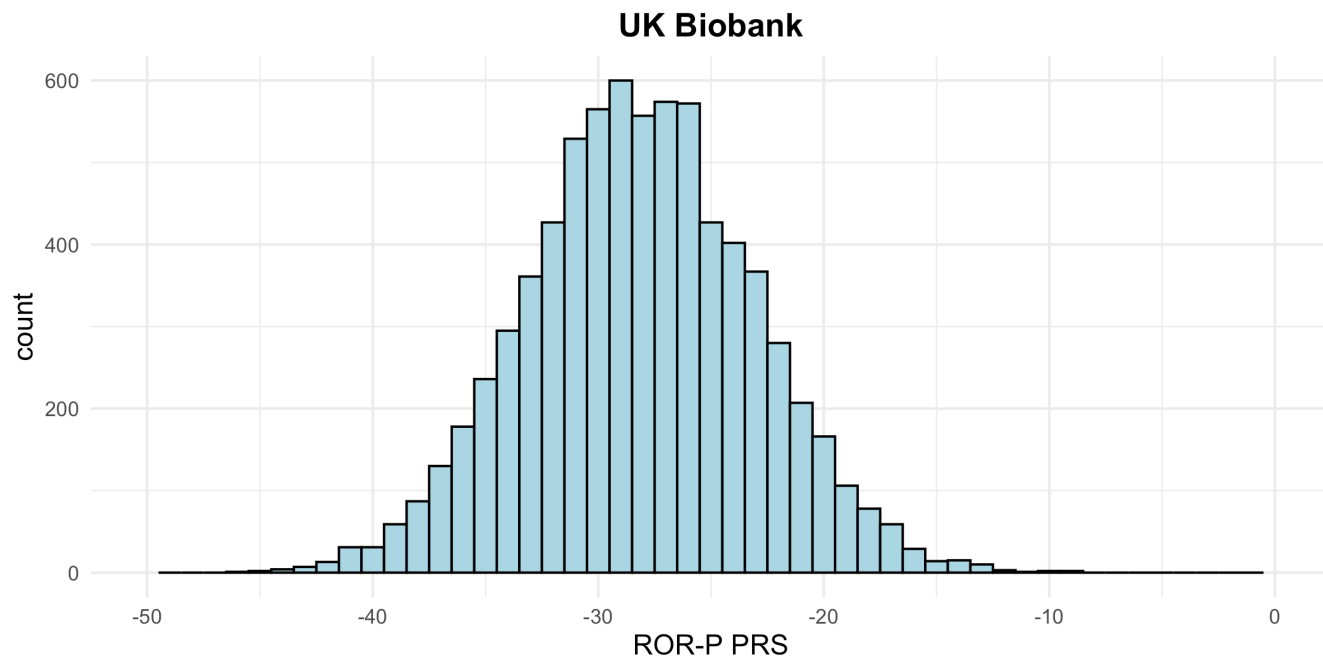

B.

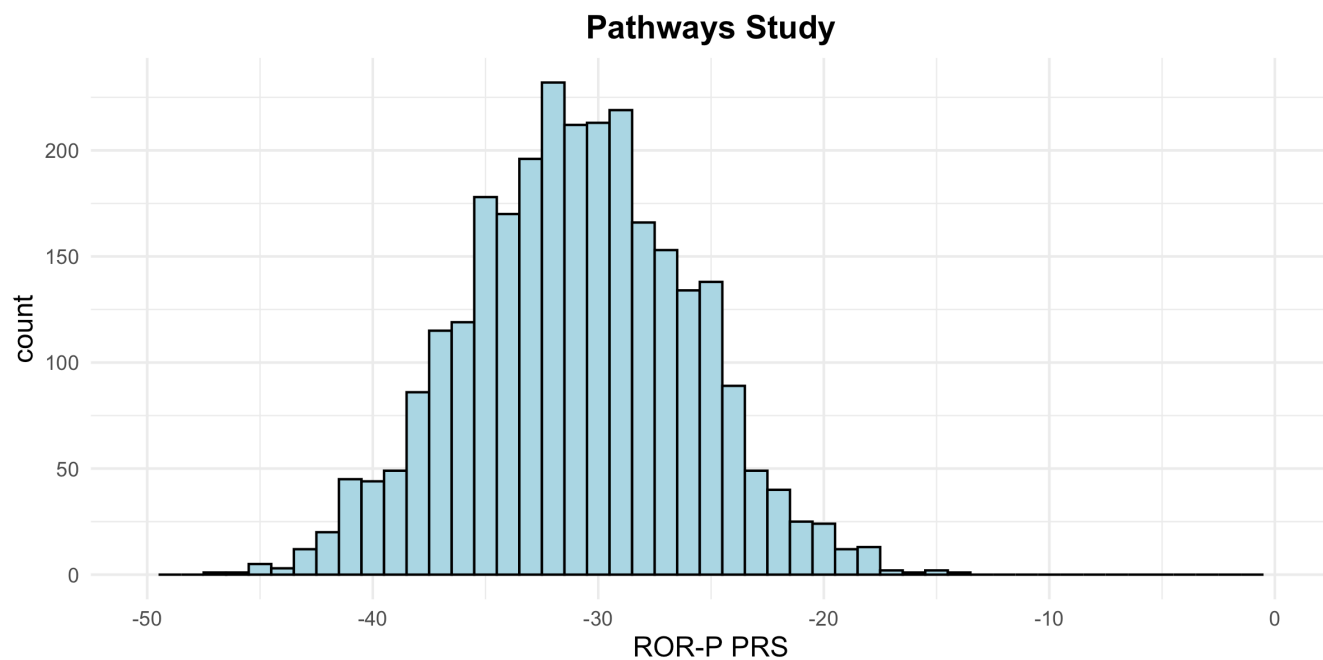

**Supplementary Figure 4. Calibration of the polygenic risk score for the risk of recurrence score weighted on proliferation (ROR-P PRS) in the UK Biobank**

Predicted versus observed 5-year survival based on the ROR-P PRS are plotted for incident cases in the UK Biobank. Estimates are shown for 7,427 participants divided into 10 strata of predicted survival probability. Black dots correspond to the Kaplan-Meier survival estimate (with 95% error bars) for each stratum of predicted survival. Blue X's correspond to bias-corrected estimates. The gray line corresponds to ideal calibration. The distribution of predicted survival probabilities is shown along the upper horizontal axis.

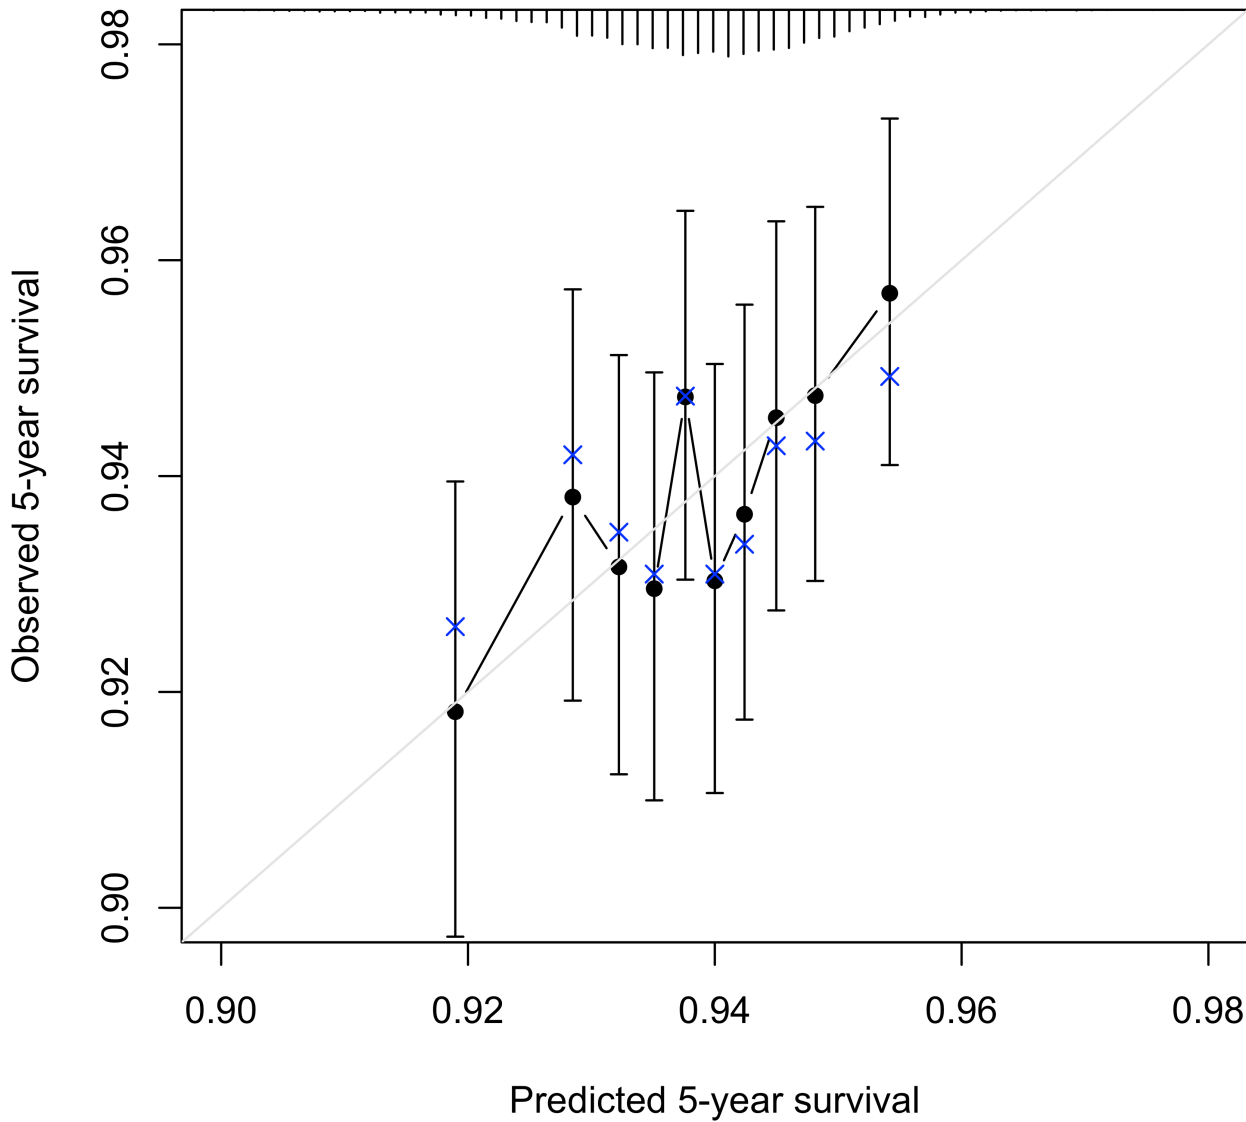

### Supplementary Figure 5. Validation of the polygenic risk score for estrogen-negative versus positive breast cancer (PRSE<sub>ER-/ER+</sub>)

Boxplot of PRSE<sub>ER-/ER+</sub> by immunohistochemical estrogen receptor status in Pathways. Boxes represent the interquartile range (IQR) and the center lines represent the median. Whiskers denote the minimum and maximum values, calculated as the first quartile - 1.5\*IQR and third quartile + 1.5\*IQR, respectively. Dots represent outliers beyond the minimum and maximum values. The p-value for the t-test is shown.

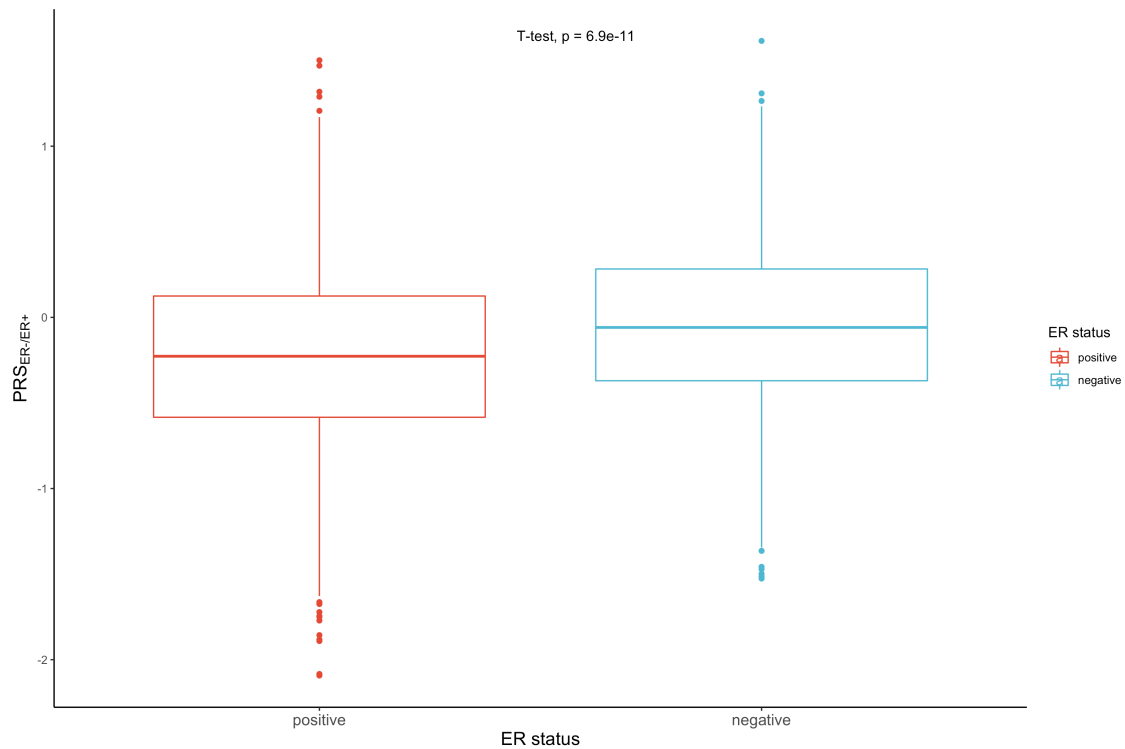



**Supplementary Figure 6. Correlation between polygenic risk scores for the risk of recurrence score weighted on proliferation (ROR-P PRS) and risk of estrogen-negative versus positive breast cancer ( $PR_{ER-/ER+}$ ) in the UK Biobank and Pathways Study**

Scatter plot of the normalized ROR-P PRS and log-transformed  $PR_{ER-/ER+}$  in the (A) UK Biobank and (B) the Pathways Study. The Pearson correlation coefficient and p-value are shown.

A.

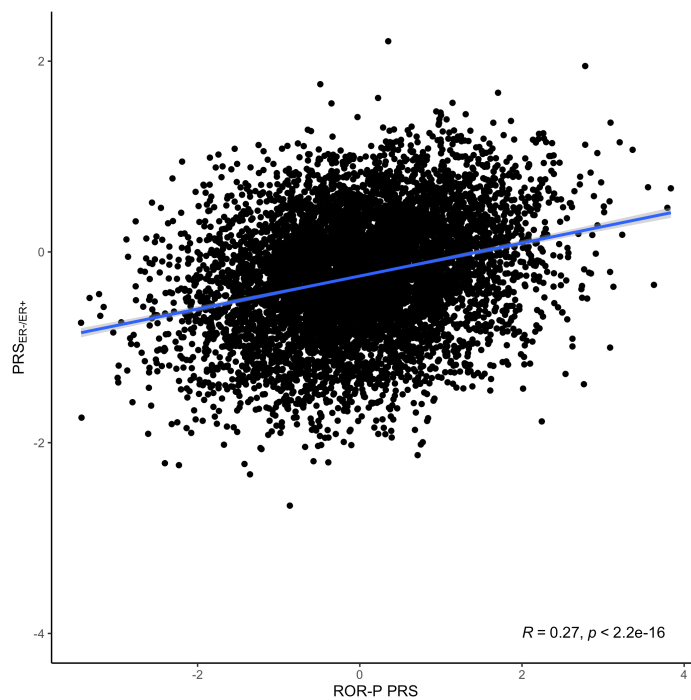

B.

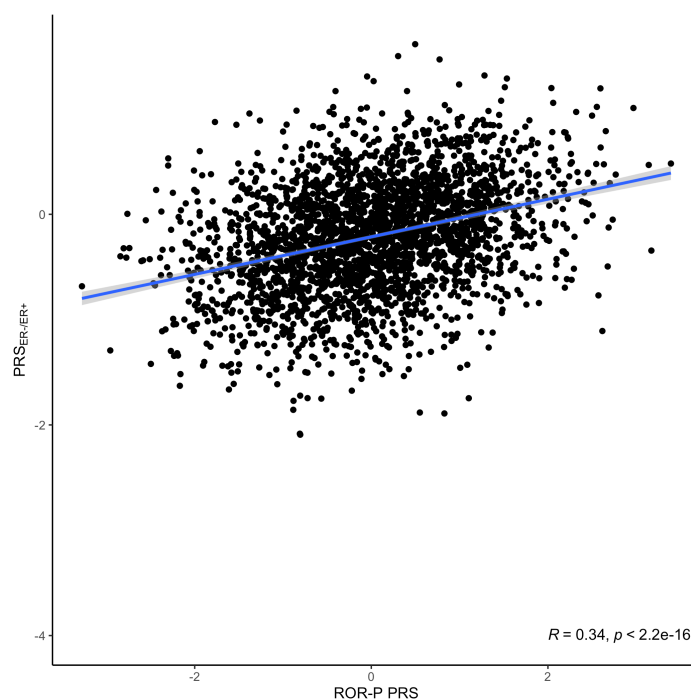

**Supplementary Figure 7. Performance of the polygenic risk score for the risk of recurrence score weighted on proliferation (ROR-P PRS) by estrogen receptor status in the Pathways Study**

(A) Kernel density plot of the ROR-P PRS stratified by estrogen receptor (ER) status. The ROR-P PRS was higher in ER-negative cancers than in ER-positive cancers, mean (standard deviation) of -30.5 (4.9) versus -31.1 (5.0) (t-statistic = -2.2, p = 0.03). (B) Forest plot of the associations between the ROR-P PRS and breast cancer-specific survival in ER-positive cancers (2,386 cases with 177 events) and ER-negative cancers (382 cases with 64 events). Cox proportional hazards models were adjusted for genetic ancestry (principal components 1-10). Hazard ratios per standard deviation are shown.

A.

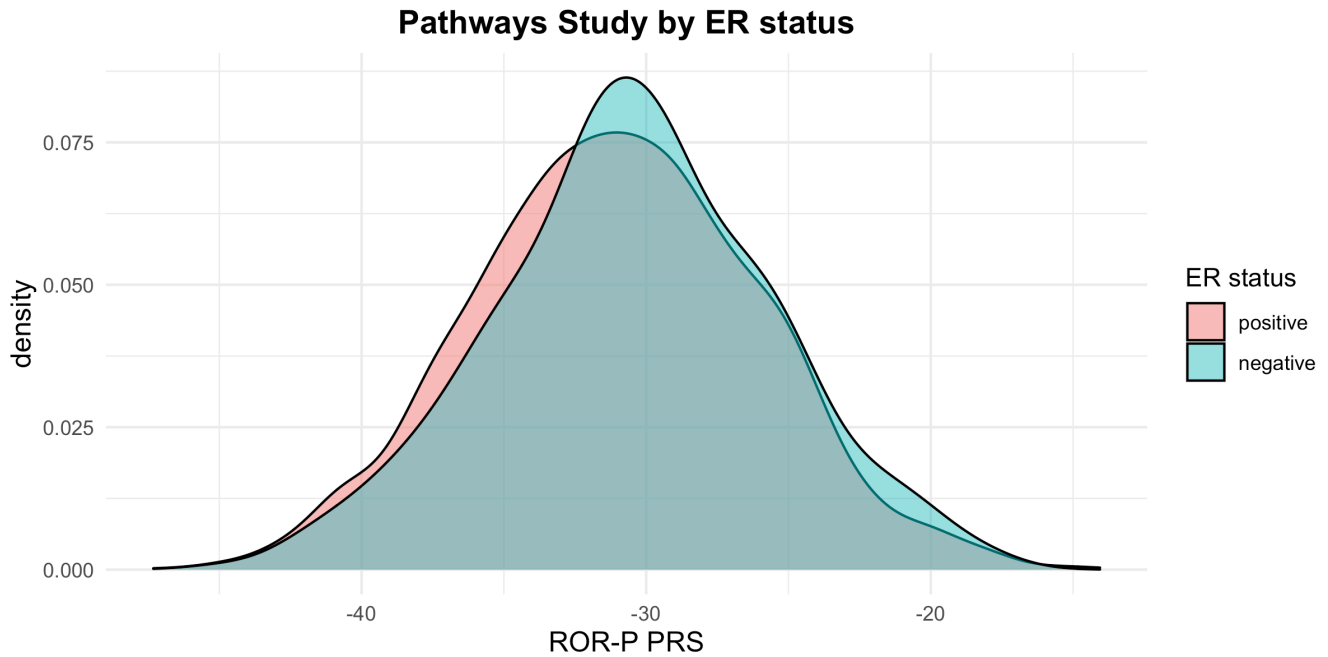

B.

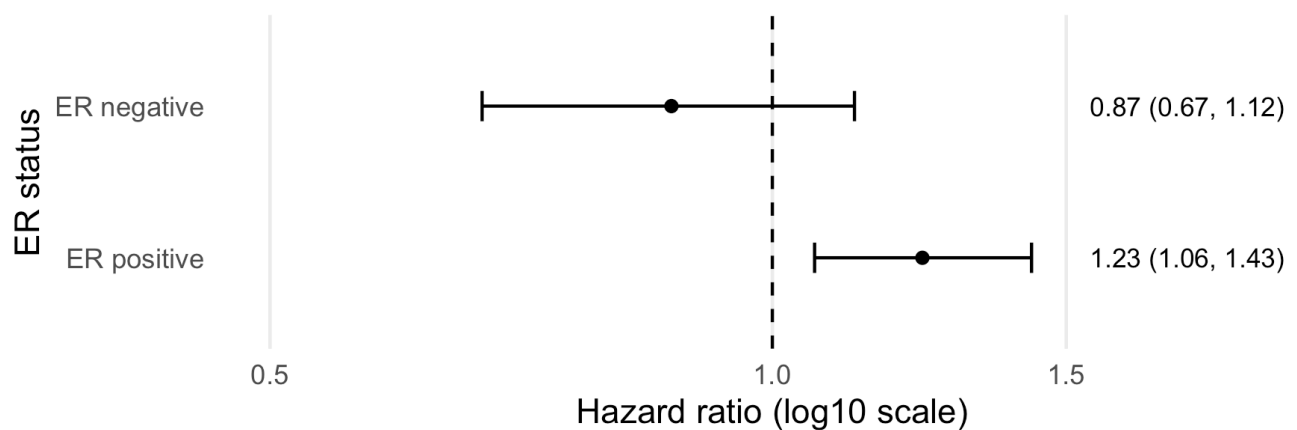

Supplement: 41698_2023_382_MOESM1_ESM.pdf [file 41698_2023_382_MOESM1_ESM.pdf]
